# Friendly regulates membrane depolarization induced mitophagy in Arabidopsis

## Authors

Juncai Ma<sup>1</sup>, Zizhen Liang<sup>1</sup>, Jierui Zhao<sup>2</sup>, Pengfei Wang<sup>1</sup>, Wenlong Ma<sup>1</sup>, Juan A. Fernandez Andrade<sup>3</sup>, Yonglun Zeng<sup>1</sup>, Nenad Grujic<sup>2</sup>, Liwen Jiang<sup>1</sup>, Yasin Dagdas<sup>2\*</sup>, Byung-Ho Kang<sup>1\*</sup>

## Affiliations

<sup>1</sup>School of Life Sciences, Centre for Cell & Developmental Biology and State Key Laboratory of Agrobiotechnology, The Chinese University of Hong Kong, Shatin, New Territories, Hong Kong, China. <sup>2</sup>Gregor Mendel Institute (GMI), Austrian Academy of Sciences, Vienna BioCenter (VBC), Vienna, Austria. <sup>3</sup>Department of Physiology and Pharmacology, Western University, London, Ontario, Canada.

\*e-mail: [bkang@cuhk.edu.hk](mailto:bkang@cuhk.edu.hk), [yasin.dagdas@gmi.oeaw.ac.at](mailto:yasin.dagdas@gmi.oeaw.ac.at)

## Abstract

The oxidative environment within the mitochondria makes them particularly vulnerable to proteotoxic stress. To maintain a healthy mitochondrial network, eukaryotes have evolved multi-tiered quality control pathways. If the stress cannot be alleviated, defective mitochondria are selectively removed by autophagy via a process termed mitophagy. Despite significant advances in metazoans and yeast, in plants, the molecular underpinnings of mitophagy are largely unknown. Here, using time-lapse imaging, electron tomography and biochemical assays, we show that uncoupler treatments cause loss of mitochondrial membrane potential and induce autophagy in Arabidopsis. The damaged mitochondria are selectively engulfed by autophagosomes that are ATG5 dependent and labelled by ATG8 proteins. Friendly, a member of the Clustered Mitochondria protein family, is recruited to the damaged mitochondria to mediate mitophagy. In addition to stress, mitophagy is also induced during de-etiolation, a major cellular transformation during photomorphogenesis that involves chloroplast biogenesis. De-etiolation triggered mitophagy regulates cotyledon greening, pointing towards an inter-organellar cross-talk mechanism. Altogether our results demonstrate how plants employ mitophagy to recycle damaged mitochondria during stress and development.

## 1 Introduction

2 Mitochondria are highly dynamic double-membraned organelles that function as cellular  
3 powerhouses. They generate energy via oxidative phosphorylation (OXPHOS) and mediate  
4 the synthesis of essential macromolecules such as iron-sulfur clusters<sup>1,2</sup>. One of the by-  
5 products of the oxidative environment in mitochondria is generation of toxic reactive oxygen  
6 species that damage mitochondrial DNA, lipids and proteins. In addition, although most of the  
7 mitochondrial proteins are encoded by nuclear genes, 13 subunits of the oxidative  
8 phosphorylation complexes are still encoded by the mitochondrial genome. As the inter-  
9 genome coordination could be disrupted, and one cell could have thousands of times more  
10 copies of mitochondrial genome than the nuclear genome; imbalances in stoichiometries of  
11 these multi-subunit OXPHOS complexes trigger proteotoxic stress<sup>3,4</sup>. To overcome these  
12 challenges and maintain a healthy mitochondrial network, eukaryotes have evolved multi-  
13 tiered and interconnected mitochondrial quality control pathways<sup>3</sup>.

14  
15 One of the major mitochondrial quality control pathways is mitophagy, the selective  
16 removal of damaged or superfluous mitochondria via autophagy. As many players involved in  
17 mitophagy have been associated with disease, and mitophagy allows us to visualize selective  
18 engulfment of an organelle into an autophagosome, mitophagy is one of the best studied  
19 signalling mechanisms in metazoans<sup>5-8</sup>. One of the hallmarks of damaged mitochondria is loss  
20 of membrane potential<sup>3</sup>. Various chemical protonophores such as carbonyl cyanide p-  
21 trifluoro-methoxyphenyl hydrazone (FCCP) or 2,4-dinitrophenol (DNP) have been used to  
22 induce mitochondrial membrane depolarization and mitophagy<sup>9</sup>. Loss of mitochondrial  
23 membrane potential leads to the stabilization of PINK1 on mitochondrial outer membrane.  
24 PINK1 phosphorylates ubiquitin and activates Parkin on mitochondrial membrane for  
25 polyubiquitination of various outer membrane proteins. This creates a positive feedback loop  
26 that results in recruitment of various selective autophagy receptors such as p62, Optineurin  
27 or NDP52 to recruit the damaged mitochondria into autophagosomes for their subsequent  
28 degradation<sup>7,10,11</sup>. Although much has been learnt about mitophagy in metazoans, molecular  
29 players that mediate mitophagy in plants is currently unknown<sup>2,12</sup>.

30  
31 Mounting evidence suggests plant mitochondria are also recycled by selective  
32 autophagy<sup>2,13</sup>. However, likely influenced by harbouring another endosymbiotic organelle,  
33 plants lack homologs of known mitophagy receptors and regulators<sup>12</sup>. Also, so far, most

34 studies used genetic and biochemical assays to analyse mitochondrial turnover in plants. Cell  
35 biological tools that would allow us to visualize different stages of mitophagy have not been  
36 established. Here, we studied uncoupler induced mitophagy in the model plant *Arabidopsis*  
37 *thaliana*. We used live cell imaging and electron tomography to visualize the engulfment of the  
38 damaged mitochondria by mitophagosomes. We supported our cell biological findings with  
39 autophagic flux assays to show autophagy regulates recycling of damaged mitochondria. We  
40 also showed that Friendly (FMT) protein that has been linked to the regulation of  
41 mitochondria dynamics is recruited to mitochondria upon damage. Consistently, *fmt* mutants  
42 have defects in formation of mitophagosomes and mitochondrial turnover. Finally, we  
43 demonstrate that de-etiolation also leads to accumulation of compromised mitochondria and  
44 induces mitophagy. Altogether, our findings establish a cell biological and biochemical platform  
45 to further dissect mitophagy and reveal a molecular player that is essential for mitophagy in  
46 plants.

47

## 48 **Results**

### 49 **Uncoupler treatments induce accumulation of depolarized mitochondria in** 50 ***Arabidopsis* root cells.**

51 Uncouplers such as DNP and FCCP perturb the electrochemical potential of inner  
52 mitochondrial membrane, triggering mitochondrial recycling in mammalian cells<sup>14</sup>. To test  
53 whether these compounds also affect mitochondria in plant root tip cells, we incubated  
54 *Arabidopsis* seedlings expressing mitochondrion-targeted GFP (Mito-GFP) in liquid MS medium  
55 containing DNP or FCCP (Fig. 1). For consistency, our live cell imaging and electron  
56 microscopy/tomography of mitochondria were limited to cortex cells in the root elongation  
57 zone. However, loss of membrane potential and mitochondrial recycling were observed in all  
58 cell types. To differentiate depolarized mitochondria, we pre-stained root cells with  
59 tetramethylrhodamine ethyl ester (TMRE), a fluorescent dye sensitive to membrane potential<sup>15</sup>.  
60 Normal mitochondria are seen as yellow puncta from dual fluorescence emitted from GFP and  
61 TMRE, while depolarized mitochondria will be green as TMRE will not fluoresce upon  
62 membrane depolarization.

63 Under normal conditions, depolarized mitochondria were rare in Mito-GFP roots (Fig.  
64 1a). When Mito-GFP roots were incubated with DNP (50  $\mu$ M) for 1 hr, numbers of  
65 depolarized mitochondria increased significantly (Fig. 1a,c). Inactivation of a core  
66 macroautophagy gene, *ATG5*, in the Mito-GFP line (*atg5-1::Mito-GFP*) led to accumulation of

67 more depolarized mitochondria in DNP-treated as well as untreated roots, indicating that  
68 removal of depolarized mitochondria requires ATG5 (Fig. 1b,d). Addition of Concanamycin A  
69 (ConA), an inhibitor of vacuolar H<sup>+</sup>-ATPase that disrupts protein transport to the vacuole<sup>16</sup>,  
70 led to further build-up of mitochondria lacking membrane potential in Mito-GFP roots,  
71 indicating vacuole is the final destination for these depolarized mitochondria. Importantly,  
72 ConA did not lead to a similar build-up of depolarized mitochondria in *atg5-1::Mito-GFP* roots  
73 (Fig. 1d, Extended Data Fig. 1). These observations agree with the inhibition of autophagy by  
74 ConA<sup>17,18</sup> and suggest that depolarized mitochondria are recycled via the macroautophagy  
75 machinery in *Arabidopsis* root cells.

76 FCCP was a more potent uncoupler than DNP, depolarizing almost all mitochondria at a  
77 lower concentration after 1 hr (Fig. 1). In the following analyses, however, we employed DNP  
78 to trigger mitophagy, because its slower action facilitated the monitoring of the mitophagy  
79 dynamics via cell biological and biochemical assays.

80

### 81 **Uncoupler treatments induce autophagy**

82 To examine whether autophagosome formation is induced following the uncoupler stress,  
83 we visualized a member of the *Arabidopsis* ATG8 family, ATG8e, fused with a YFP (YFP-  
84 ATG8e). ATG8 is widely used as a marker for autophagosomes in all eukaryotes<sup>19,20</sup>. Under  
85 normal conditions we rarely observed puncta; most of the ATG8 signal was diffuse. However,  
86 The YFP-ATG8e foci multiplied in root cells after 1 hr of DNP treatment, and their numbers  
87 continued to increase at later time points (Fig. 2a,b). Upon activation of autophagy, ATG8  
88 becomes conjugated to phosphatidylethanolamine (PE) by a complex containing ATG5, and  
89 affixed to the limiting membrane of autophagosomes<sup>17</sup>. The lipidated form of ATG8 runs faster  
90 in western blots, and the ratio between lipidated and unlipidated ATG8 is used as a proxy to  
91 measure autophagy<sup>16</sup>. Immunoblot analyses with ATG8 antibody revealed only a faint upper  
92 band in untreated wild type (WT) cells (Fig. 2c). This band became more abundant by DNP  
93 treatment, especially in the membrane fraction. Samples incubated with phospholipase D  
94 (PLD) or samples from *atg5-1* mutants lacked the upper band (Fig. 2d). Altogether, these  
95 results suggest that ATG8 lipidation is induced upon DNP treatment in an ATG5 dependent  
96 manner.

97 To further confirm that the uncoupler stress induces autophagosome formation and  
98 vacuolar delivery, we performed GFP cleavage assay with the YFP-ATG8e line and *atg5-1*  
99 mutant line expressing an mCherry-ATG8e chimeric protein (mCherry-ATG8e::*atg5-1*). A

100 free YFP polypeptide was detected in YFP-ATG8e samples and its amount increased over  
101 time with a concomitant drop in YFP-ATG8e (Fig. 2e,f). No free mCherry was discerned in  
102 the immunoblot of mCherry-ATG8e::*atg5-1* by an anti-mCherry antibody (Fig. 2e). Excitingly,  
103 DNP treatment did not affect the autophagic flux of an aggregate receptor, Neighbor of  
104 BRCA1 (NBR1)<sup>21</sup> (Fig. 2e). These data suggest that uncoupler treatment activates a selective  
105 autophagy pathway to recycle depolarized mitochondria.

106

### 107 **Damaged mitochondria are selectively engulfed by autophagosomes in uncoupler** 108 **treated root cells.**

109 We then examined if DNP induced autophagosomes were indeed engulfing mitochondria  
110 by staining YFP-ATG8e root cells with MitoTracker Red (MTR). Under a confocal microscope,  
111 YFP-positive puncta were seen in the vicinity of mitochondria (Fig. 3a). In higher magnification  
112 micrographs, we were able to identify ATG8e-specific fluorescent structures resembling open  
113 pouches that contain mitochondria (arrowheads, Fig. 3b). We were also able to observe  
114 mitochondria that were entirely surrounded by YFP-ATG8e rings (white arrow, Fig. 3b). In  
115 time-lapse live cell imaging, YFP-ATG8e pockets partially enclosing a mitochondrion were  
116 seen to grow, eventually encapsulating the mitochondrion over 300 seconds (Fig. 3c). These  
117 autophagic compartments (i.e., mitophagosomes) were approximately 1-2  $\mu\text{m}$  in diameters  
118 and each carried a single mitochondrion. MTR stains depolarized mitochondria better than  
119 TMRE but does not concentrate in mitochondria with no membrane potential<sup>22</sup>. In this vein,  
120 empty autophagosomes matching the size of mitophagosomes (grey arrow in Fig. 3b) in our  
121 micrographs could correspond to mitophagosomes carrying mitochondrial corpses.

122 A time-lapse movie revealed that a small YFP-ATG8e puncta arose near MTR stained  
123 mitochondria and elongated to be a semicircle capturing a mitochondrion. This process took  
124 about 10 mins (Extended Data Fig. 2a). Another video documented an incomplete  
125 mitophagosome that expanded to enclose a mitochondrion fully (Extended Data Fig. 2b).  
126 Elongating tips of phagophores stayed in contact with the mitochondrial surface throughout  
127 their growth (Extended Data Fig. 3a). From our live cell microscopy data, we estimated that  
128 it takes about 15 min for mature mitophagosomes to develop from an initial YFP-ATG8 spot  
129 on a mitochondrion.

130 We then cryofixed root samples and performed transmission electron microscopy (TEM)  
131 analysis. Mitochondria in control samples had smooth cristae that are evenly dispersed in the  
132 matrix (Fig. 3d,g). By contrast, mitochondria in DNP treated cells had electron-dense

133 precipitates in their matrix, some of which were engulfed by double membraned  
134 mitophagosomes (Fig. 3 e-k). Serial section TEM of mitophagosomes showed that one  
135 mitochondrion was contained per autophagosome, and no other organelles were identified in  
136 autophagosomes (Extended Data Fig. 3b,c), in agreement with the live cell imaging results (Fig.  
137 3b,c). Electron tomography analysis revealed that mitochondria sequestered in  
138 mitophagosomes have more dark precipitate but less cristae in the matrix than free  
139 mitochondria (Fig. 3g-k). *Arabidopsis atg5-1* root cells had many mitochondria exhibiting the  
140 signs of the internal precipitates, but they were not associated with mitophagosomes (Fig. 3l).  
141 Altogether these results show that plant cells selectively recycle damaged mitochondria via  
142 autophagy that involves ATG5.

143 To further investigate how mitochondria are degraded during uncoupler induced  
144 mitophagy, we used immunoblot assays to assess the levels of various mitochondrial proteins  
145 in *Arabidopsis* WT and *atg5-1* mutant lines. We treated *Arabidopsis* seedlings with DNP for one  
146 to four hours (D1-D4). To distinguish between uncoupler induced mitophagy and bulk  
147 autophagy, we used nitrogen starvation as control (Extended Data Fig. 4). In contrast to the  
148 endoplasmic reticulum protein Cycloartenol-C24-methyl transferase (SMT1), levels of outer  
149 mitochondrial membrane (OMM) proteins peripheral-type benzodiazepine receptor (PBR)  
150 and voltage dependent anion channel 1 (VDAC1); inner mitochondria membrane (IMM)  
151 proteins cytochrome oxidase subunit II (COXII) and L-galactono-1,4-lactone dehydrogenase  
152 (GLDH), and mitochondria matrix (MM) protein isocitrate dehydrogenase (IDH) were all  
153 reduced upon uncoupler treatment (Fig. 4a). The reduction in protein levels were due to  
154 vacuolar degradation as addition of ConA prevented the degradation (Fig. 4b). Furthermore,  
155 the degradation was dependent on ATG5, since protein levels did not change significantly in  
156 DNP treated *atg5-1* mutant specimens (Fig. 4a,c). Interestingly, OMM proteins showed higher  
157 levels of degradation in contrast to IMM and matrix proteins. Since, previous studies in  
158 mammalian cells showed OMMs could also be degraded via the proteasome<sup>23</sup>, we checked  
159 OMM protein levels of DNP treated cells following proteasome inhibition by MG132. Adding  
160 MG132 indeed stabilized only OMM proteins but not IMM or matrix proteins (Fig. 4d).  
161 Considered together with normalized quantification of protein levels (Fig. 4e,f), these  
162 experiments suggest upon loss of membrane potential, proteasome and autophagy cooperate  
163 to degrade OMM proteins, whereas IMM and matrix proteins are primarily degraded by  
164 autophagy.

165

166 **Friendly is essential for uncoupler induced mitophagy.**

167 We then wanted to identify molecular players that mediate mitophagy in plants. Previous  
168 studies have shown that for both ubiquitin dependent and independent mitophagy pathways,  
169 mitochondrial network needs to be fragmented<sup>24,25</sup>. In *Arabidopsis*, Friendly (FMT), a clustered  
170 mitochondria (CLU) family protein, has been shown to play important roles in mitochondrial  
171 dynamics<sup>26</sup>. However, whether it plays a role in mitophagy wasn't addressed. YFP-FMT  
172 exhibited a diffuse cytosolic pattern under normal conditions. Interestingly, upon DNP  
173 treatment, YFP-FMT localized to puncta that colocalized with mitochondria (Fig. 5a). Pull  
174 down experiments showed that uncoupler treatment led to specific association of YFP-FMT  
175 with ATG8, suggesting that YFP-FMT localizes to mitophagosomes (Fig. 5b). This prompted  
176 us to analyse mitophagy in *fmt* mutant. Consistent with our previous findings presented in Fig.  
177 3, live cell imaging of GFP-tagged mitochondria in mCherry-ATG8e expressing WT cells  
178 showed ATG8e labelled vesicles engulfed mitochondria upon uncoupler treatment. However,  
179 in *fmt* mutant, although ATG8 puncta were associated with the mitochondria, we did not  
180 observe engulfment of mitochondria within autophagosomes (Fig. 5c). Further analyses of  
181 mitophagosomes in the *fmt* mutant using TEM revealed aberrant mitophagosomes with  
182 disconnected edges (Fig. 5c).

183 To further test the role of FMT in mitophagy, we performed live cell imaging and  
184 immunoblot based autophagic flux experiments. Staining of depolarized mitochondria with  
185 TMRE upon uncoupler treatments revealed accumulation of damaged mitochondria in the  
186 cytosol of *fmt* mutants (Fig. 6a). Quantification of depolarized mitochondria showed *fmt*  
187 mutants accumulated significantly more mitochondria in contrast to WT cells (Fig. 6b).  
188 Furthermore, morphometric analyses of mitochondria in TEM micrographs from WT, *fmt* and  
189 *atg5-1* mutants showed that mitochondria were significantly larger in *fmt* and *atg5-1* mutants  
190 (Extended Data Fig. 5). Finally, immunoblot analyses using mitochondrial compartment specific  
191 antibodies also showed a delay of mitochondrial protein degradation in *fmt* mutant (Fig. 6c).  
192 Comparative analyses of the polypeptide intensities indicated that although *fmt* mutant had a  
193 significant defect in mitochondrial protein recycling (Fig. 6d), it was not as severe as the *atg5-*  
194 *1* mutant (Fig. 4d,e), suggesting, in the absence of FMT, compensatory pathways prevent  
195 accumulation of the toxic damaged mitochondria in the cell. Altogether these experiments  
196 suggest FMT is required for mitophagy in plants.



## 198 **Cotyledon greening during de-etiolation is affected in *atg5-1* mutant seedlings.**

199 In germinating seeds, under darkness, proplastids transform into etioplasts that are  
200 characterized by paracrystalline arrays of prolamellar bodies in their stroma<sup>27</sup>. The etioplast  
201 quickly transforms into the chloroplast upon exposure to light, a major developmental transition  
202 termed de-etiolation. Since mitochondrial and chloroplast functions are tightly interconnected,  
203 we hypothesized that mitochondrial population may also undergo remodelling during de-  
204 etiolation. First, we monitored greening of cotyledons when dark grown seedlings were  
205 exposed to light. Green pigment levels increased gradually over a 12 hr period, with a significant  
206 rise at eight hours after illumination (Fig. 7a,b). We then measured amounts of mitochondrial  
207 proteins in greening cotyledon cells and showed that their levels also drop at 8 hr time point,  
208 suggesting an accelerated removal of mitochondria (Fig 7c). Consistently, mitophagosomes  
209 were most frequently detected in cotyledon cell sections from 6 and 8 hr samples under TEM  
210 (Fig. 7d). Cotyledon greening was severely affected in *atg5-1* mutant seedlings and no  
211 mitophagosomes were discerned in their cotyledon cells (Fig. 7 a,b,e). These results indicate  
212 de-etiolation is a physiological stress condition for mitochondria where mitophagy is induced to  
213 mediate mitochondrial turnover that underlies light activated cotyledon development.

## 214 **Discussion**

215 Research in the last decade has transformed autophagy from a bulk degradation system  
216 to a highly selective cellular quality control pathway that rapidly removes toxic or superfluous  
217 macromolecules<sup>28,29</sup>. Especially organelles that get damaged due to metabolic and physiological  
218 stress conditions are mainly recycled via distinct selective autophagy pathways<sup>6</sup>. Consistently,  
219 in all the eukaryotes tested so far, autophagy is essential for adapting to environmental  
220 changes<sup>12,30</sup>. However, despite significant advances made in metazoan selective autophagy field,  
221 how plants recycle their organelles are still mostly unknown. Although the core autophagy  
222 machinery that mediates formation of the autophagosome is highly conserved in plants,  
223 selective autophagy receptors and adaptors that are responsible for recognition and  
224 recruitment of damaged organelles to the autophagosomes are not well conserved<sup>12</sup>. For  
225 example, there are up to eight different receptor proteins and dozens of accessory proteins  
226 that have been shown to mediate various mitophagy pathways in mammalian cells<sup>3</sup>. Homologs  
227 of most of those proteins are lacking in plant genomes, implying plant mitophagy have followed  
228 a different evolutionary path, likely due to the presence of another endosymbiont in the cell.



229 Here, we have established a detailed toolbox to study mitophagy in plants. We have  
230 shown that protonophore uncouplers specifically induce mitophagy similar to metazoans. Our  
231 findings also revealed high levels of mitophagy during de-etiolation, a fundamental  
232 developmental step that allows plants to survive day light after germination. Excitingly, our  
233 studies also revealed a molecular player, the Friendly protein, that is essential for mitophagy.

### 234 **Mitochondrial membrane potential is closely monitored by mitochondrial quality** 235 **control pathways**

236 As the primary producer of ATP in eukaryotic cells, healthy mitochondria must maintain  
237 the electrochemical potential. It is conceivable that the loss/reduction in the potential serves  
238 as a mark for the mitophagy machinery to recognize malfunctioning mitochondria. For  
239 example, in the PINK1/Parkin-dependent mitophagy pathway of mammalian cells, a  
240 mitochondrion-localized protein kinase, Pink1, is stabilized when the membrane potential  
241 drops and this leads to the activation of downstream effectors<sup>31</sup>. In *C. elegans* sperm  
242 mitochondria are rapidly removed from the oocyte via mitophagy upon fertilization<sup>32,33</sup>.  
243 Although the underlying mechanism of depolarization is still unknown, the paternal  
244 mitochondria that is recycled by mitophagy loses its membrane potential prior to mitophagy<sup>15</sup>.  
245 Our uncoupler treatments clearly demonstrated that membrane potential serves as a proxy  
246 for mitochondrial health across different organisms and loss of membrane potential triggers  
247 mitophagy. However, how plants tag depolarized mitochondria for mitophagy needs to be  
248 further investigated.

249

250 Mitochondria in mammalian and yeast cells undergo cycles of fusion and fission. This  
251 mitochondrial dynamics collaborate with mitophagy; fusion can rescue damaged mitochondria  
252 by diluting their injuries while fission singles out aberrant mitochondria for mitophagy. It was  
253 shown that mitochondria fusion is inhibited when the mitochondrial membrane potential is  
254 dissipated by uncouplers<sup>34</sup>. Mitochondria in *Arabidopsis* root cells are mostly round, indicating  
255 that mitochondria fission dominates over fusion<sup>35</sup>. Therefore, our system is not suited for  
256 investigating the link between mitochondria's membrane potential and their fusion/fission  
257 dynamics. Some plant cells including seed cells after germination or shoot apical meristem  
258 cells have elongated mitochondria constituting a network<sup>36,37</sup>. These cells are better for testing  
259 whether mitochondria fragment in response to uncoupler stresses and studying roles of  
260 mitochondria fission in plant mitophagy.

261

262 **Ultrastructural features of compromised mitochondria and mitophagosomes in**  
263 ***Arabidopsis* root cells.**

264

265 Mitochondria with dark aggregates and shrivelled cristae in the matrix appeared after  
266 incubation with uncouplers. They were also abundant in de-etiolating cotyledon cells and *fmt*  
267 mutant cells (Fig. 3 and Extended Data Fig. 1). These impaired mitochondria were rare in  
268 DMSO control samples but frequently observed in *atg5-1* mutant samples in TEM images.  
269 Considering that they are specifically targeted by and enclosed in mitophagosomes, they  
270 correspond to depolarized mitochondria being recycled. Sperm mitochondria in cryofixed *C.*  
271 *elegans* oocytes also exhibited similar ultrastructural features<sup>15,38</sup>. However, we did not  
272 observe large ruptures in mitochondrial membranes reported in TEM analysis of mammalian  
273 mitophagy where cells were preserved by chemical fixation<sup>39</sup>.

274

275 An intriguing feature that we noticed in our TEM analysis is that tips of the elongating  
276 phagophores were in contact with the mitochondrial surface (Fig. 3e, arrowheads). This  
277 observation is consistent with the YFP-ATG8e fluorescence that expanded tightly over  
278 mitochondria in the time-lapse recordings (Fig. 3c). The affinity between the autophagosome  
279 membrane and mitochondria explains why mitophagosomes usually have one damaged  
280 mitochondrion, and they do not capture other organelles. It also suggests specific protein-  
281 protein interactions regulate the two membranes, which need to be investigated further.

282

283 **FMT is essential for mitophagy in plants.**

284

285 FMT is required for normal mitochondria distribution in the plant cell, possibly regulating  
286 association between individual mitochondria before fusion<sup>26</sup>. We have shown that DNP-  
287 induced mitochondria recycling is affected in *fmt* mutant cells, and FMT associates with ATG8  
288 upon mitochondrial damage. These data suggest that FMT associates with autophagosomes  
289 during mitophagy. Because FMT is a protein shuttling between the cytosol and mitochondria,  
290 it is tempting to speculate that FMT may participate in an autophagy receptor or adaptor  
291 complex through which the core autophagy machinery is recruited to mitochondria. It is also  
292 possible that FMT plays a role in the repair of damaged mitochondria by controlling their  
293 interaction with the healthy mitochondria, and excessive accumulation of FMT triggers the  
294 onset of mitophagy.

295

296 FMT is a highly conserved protein with orthologs in evolutionarily distant eukaryotes  
297 including yeast and metazoans<sup>40</sup>. *fmt* mutants exhibit similar phenotypes where mitochondria  
298 form large clusters next to nucleus. The *Drosophila* FMT homolog Clueless positively  
299 regulates PINK1/Parkin dependent mitophagy by suppressing mitochondrial fusion<sup>41</sup>. Recent  
300 studies have shown that mammalian FMT homolog CLUH could bind RNA to form granules.  
301 CLUH granules regulate translation of mRNAs linked to metabolic activity and regulate  
302 mitophagy and metabolic reprogramming<sup>42,43</sup>. Plants lack PINK1/Parkin homologs, so whether  
303 FMT regulates mitophagy by forming stress activated granules or via a PINK/Parkin-like  
304 pathway need to be investigated further. Identification of FMT interacting proteins and RNA  
305 during nutrient starvation or uncoupler treatments could help us understand the role of FMT  
306 in mitophagy and mitochondrial quality control.

307

### 308 **Mitochondrial recycling mediate organellar reprogramming during de-etiolation.**

309

310 Reprogramming the mitochondrial functions in response to nutrient availability is critical  
311 for cell survival<sup>44</sup>. In plant cells, photosynthesis in chloroplasts and respiration in mitochondria  
312 are coordinated for homeostasis of cellular energy levels and redox status<sup>45,46</sup>. Our results  
313 from greening *Arabidopsis* cotyledons indicated that de-etiolation involves a wave of  
314 mitochondrial turnover, probably for rewiring mitochondrial metabolic network for adapting  
315 to light condition and salvaging raw materials for chloroplast biogenesis.

316

317 In skotomorphogenic seedlings, nutrients reserved in the seed are mobilized to sustain  
318 growth, and mitochondria are required for the anabolic processes. When light is available, the  
319 seedlings become photosynthetically active and capable of autotrophic growth. It was shown  
320 that the electron transport chain in mitochondria is slowed down in de-etiolating wheat leaves  
321 and chloroplasts and mitochondria are functionally more intertwined<sup>47</sup>. Accumulation of  
322 mitophagosomes and rapid changes in mitochondrial protein levels in the greening cotyledon  
323 suggest a cannibalization of pre-existing mitochondria. We speculate that the developmentally  
324 programmed mitophagy could facilitate modulation of the mitochondrial pool and biosynthesis  
325 of macromolecules for constructing new organelles. The lack of mitophagosomes and the  
326 delay in greening of the *atg5-1* mutant cotyledon agrees with the notion. Altogether, our  
327 findings on greening cotyledons present a clear example of inter-organelle communication,

328 and how mitochondria-chloroplast crosstalk could underlie a major developmental transition  
329 in plants.

330

## 331 **Methods**

### 332 **Materials and plant growth conditions**

333 All the chemicals were purchased from Sigma-Aldrich (<http://www.sigmaaldrich.com>) or Thermo-  
334 Fisher (<https://www.thermofisher.com>) unless specified. YFP-ATG8e, mCherry-ATG8e, *atg5-1*, Mito-  
335 GFP, Mito-GFP::*fmt* and FMT-YFP seeds were described previously<sup>26,48,49</sup>. mCherry-ATG8e::*atg5-1*,  
336 Mito-GFP x mCherry-ATG8e and Mito-GFP x mCherry-ATG8e::*fmt* was obtained by crossing the  
337 previously established lines<sup>26,50</sup>. All transgenic lines were genotyped by PCR and homozygous lines  
338 were isolated before experiments. All *Arabidopsis* seeds were surface-sterilized and germinated on ½  
339 Murashige and Skoog (MS) agar plate in a growth chamber at 21 °C with 16 h light–8 h dark except for  
340 de-etiolation experiments where seedlings were germinated under darkness.

### 341 **Protein extraction and immunoblot analysis**

342 Isolation of mitochondrial membrane proteins and GFP cleavage assay were carried out as described  
343 previously<sup>48,51</sup>. Briefly, seven-day-old *Arabidopsis* seedlings were incubated in DMSO, 50 µM DNP, 50  
344 µM MG132 or 1 µM ConA with indicated times in liquid half MS medium when necessary. Seedlings  
345 for the nitrogen starvation experiments were germinated on half MS medium agar plate and then  
346 transfer to liquid half MS medium without nitrogen for 1 day. All the protein samples were subjected  
347 to 15% SDS-PAGE. Primary and secondary antibodies were diluted in 1x phosphate buffered saline  
348 (PBS). Antibodies against GFP (Abcam), YFP (Agrisera), mCherry (Abcam), ATG8 (Agrisera), voltage-  
349 dependent anion channel 1 (VDAC1; Agrisera), peripheral-type benzodiazepine receptor (PBR;  
350 PhytoAB), cytochrome oxidase subunit II (COXII; Agrisera), L-galactono-1,4-lactone dehydrogenase  
351 (GLDH; Agrisera, PhytoAB) and isocitrate dehydrogenase (IDH; Agrisera), Cycloartenol-C24-methyl  
352 transferase (SMT1; Agrisera), Coatomer subunit gamma (Sec21p; Agrisera) were obtained from the  
353 indicated sources. We performed Student's t test (one-tailed and unpaired test) with the triple  
354 replicate immunoblot data and the quantification of band intensities was performed using ImageJ  
355 (National Institutes of Health) and Microsoft Excel 2016, the graphs were made by Prism8 (GraphPad  
356 Software). Representative of at least three independent immunoblot results were shown in the figures.

### 357 **ATG8 delipidation assay**

358 Protein extraction methods for ATG8-delipidation were described previously<sup>52</sup>. Seven-day-old  
359 *Arabidopsis* seedlings were incubated in 50 µM DNP for 2 hours before protein extraction. The total  
360 plant lysates were extracted in lysis buffer [50 mM Tris-HCl (pH 8.0), 150 mM NaCl, 0.5 mM

361 Ethylenediaminetetraacetic acid (EDTA) and 1x Complete Protease Inhibitor Cocktail] and then  
362 centrifuged at 14 000 rpm for 10 min at 4 °C. The supernatant was centrifuged at 100 000 g for 1 h,  
363 with the membrane pellet then solubilized in lysis buffer containing 0.5% (v/v) Triton X-100. The  
364 solubilized membrane samples were incubated at 37°C for 1 h with 250 unit/ml of phospholipase D  
365 (PLD) or an equal volume of its buffer. Protein samples were subjected to 15% SDS-PAGE in the  
366 presence of 6 M urea and analyzed by immunoblot with anti-ATG8 antibody.

### 367 **Immunoprecipitation**

368 Protein extraction and immunoprecipitation were performed as described previously<sup>48</sup>. Seven-day-old  
369 *Arabidopsis* seedlings were incubated in 50 µM DNP for 2 hours before protein extraction. Total plant  
370 lysates were centrifuged at 14000 rpm for 10 min at 4 °C. The supernatant was prepared in lysis buffer  
371 (10 mM Tris/HCl at pH 7.4, 150 mM NaCl, 0.5 mM EDTA, 5% glycerol, 0.2% Nonidet P-40, and 2 mM  
372 dithiobis [succinimidyl propionate] containing 1x Complete Protease Inhibitor Cocktail) and then  
373 incubated with GFP-TRAP agarose beads (ChromoTek) for 2 hours at 4°C. The beads were washed  
374 five times (4°C) in wash buffer (10 mM Tris/HCl, pH 7.5, 150 mM NaCl, and 0.5 mM EDTA with 1x  
375 Complete Protease Inhibitor Cocktail) and then eluted by boiling in 2x SDS sample buffer. Samples  
376 were separated by SDS-PAGE and analyzed by immunoblot using indicated antibodies.

377

### 378 **Confocal microscopy and image processing**

379 Confocal fluorescence images were acquired using the Leica SP8 laser scanning confocal system with  
380 a 63x water lens. Seven-day-old *Arabidopsis* seedlings were incubated in DMSO, 50 µM DNP, 10 µM  
381 FCCP or 0.5 µM ConA with indicated times in liquid half MS medium when necessary before imaging.  
382 Tetramethylrhodamine ethyl ester (TMRE) and MitoTracker Red (MTR) were used to stain *Arabidopsis*  
383 root cell mitochondria at 500 nm for 10 mins. A sequential acquisition was applied when observing  
384 fluorescent proteins. Images were processed with Photoshop CC (<https://www.adobe.com>) and  
385 performed Student's t test (one-tailed and unpaired test) with Microsoft Excel 2016  
386 (<https://www.microsoft.com/>). The graphs were prepared with Prism8 (<https://www.graphpad.com>).

### 387 **TEM analysis, electron tomography, and 3d modeling**

388 For TEM samples preparation, high-pressure freezing, freeze substitution, resin embedding, and  
389 ultramicrotomy were performed as described previously<sup>53,54</sup>. In brief, Seven-day-old *Arabidopsis*  
390 seedlings were incubated in DMSO or 50 µM DNP for indicated times and then rapidly frozen with  
391 an HPMI00 high-pressure freezer (Leica Microsystems). The samples were freeze-substituted at -80°C  
392 for 72 h, and excess OsO<sub>4</sub> was removed by rinsing with precooled acetone. After being slowly  
393 warmed up to room temperature over 48 h, root samples were separated from planchettes and  
394 embedded in Embed-812 resin (Electron Microscopy Sciences). Thin sections (100 nm thick) prepared

395 from sample blocks of each time point were examined with a Hitachi 7400 TEM (Hitachi-High  
396 Technologies) operated at 80 kV.

397 For dual-axis tomography analysis, semi-thick sections (250 nm) were collected on formvar-coated  
398 copper slot grids (Electron Microscopy Sciences) and stained with 2% uranyl acetate in 70% methanol  
399 followed by Reynold's lead citrate as described previously<sup>55</sup>. Tilt series were collected from 60° to -  
400 60° (1.5° intervals) with a 200-kV Tecnai F20 intermediate voltage electron microscopy  
401 (<https://www.fei.com/>). Tomograms were reconstructed as described<sup>56</sup>. To generate models of  
402 complicated thylakoid membranes, we used the autocontour command  
403 ([bio3d.colorado.edu/imod/doc/3dmodHelp/autox.html](http://bio3d.colorado.edu/imod/doc/3dmodHelp/autox.html)) of the 3dmod software package as explained  
404 in Keith and Kang (2017)<sup>57</sup>.

## 405 **Acknowledgements**

406 We appreciate Dr. Xiaohong Zhuang (Chinese University of Hong Kong) for the *atg5*  
407 *and atg7* mutant lines, David Logan and David Macharel for kindly sharing Mito-GFP and  
408 Friendly related seeds. We also thank Samantha Krasnodebski for help with generation of  
409 Arabidopsis lines. This work was supported by grants from the Research Grants Council of  
410 Hong Kong (GRF14126116, GRF14121019, C4012-16E, C4002-17G, and AoE/ M-05/12) and  
411 Cooperative Research Program for Agriculture Science & Technology Development (Project  
412 No. 0109532019) Rural Development Administration, Republic of Korea to B.-H.K., and  
413 Austrian Academy of Sciences and Austrian Science Fund (FWF): P32355 to Y.D.

## 414 **Author contributions**

415 J.M., Y.D., and B.-H.K. conceived and designed the experiments. J.M. performed the confocal  
416 microscopy and stereomicroscopy. J.M., Z.L., and P.W. carried out electron  
417 microscopy/tomography analysis. J.M. and J.F. prepared 3D tomographic models. J.M. and  
418 W.M. performed immunoblot and pull-down experiments. J.Z., Y.Z., and N.G. did other  
419 experiments. J.M., J.Z., Z.L., P.W., L.J., Y.D., and B.-H.K. analysed the data. J.M., Y.D., and B.-  
420 H.K. wrote the paper.

## 421 **Competing interests**

422 The authors declare no competing interests.



## 423 References

424

- 425 1. Youle, R. J. Mitochondria—Striking a balance between host and endosymbiont. *Science*  
426 (80- ). **365**, (2019).
- 427 2. Broda, M., Millar, A. H. & Van Aken, O. Mitophagy: A Mechanism for Plant Growth  
428 and Survival. *Trends Plant Sci.* **23**, 434–450 (2018).
- 429 3. Pickles, S., Vigié, P. & Youle, R. J. Mitophagy and Quality Control Mechanisms in  
430 Mitochondrial Maintenance. *Curr. Biol.* **28**, R170–R185 (2018).
- 431 4. Palikaras, K., Lionaki, E. & Tavernarakis, N. Mechanisms of mitophagy in cellular  
432 homeostasis, physiology and pathology. *Nat. Cell Biol.* **20**, 1013–1022 (2018).
- 433 5. Dikic, I. Proteasomal and Autophagic Degradation Systems.
- 434 6. Anding, A. L. & Baehrecke, E. H. Cleaning House: Selective Autophagy of Organelles.  
435 *Dev. Cell* **41**, 10–22 (2017).
- 436 7. Nguyen, T. N., Padman, B. S. & Lazarou, M. Deciphering the Molecular Signals of  
437 PINK1 / Parkin Mitophagy. **xx**, 1–12 (2016).
- 438 8. Montava-Garriga, L. & Ganley, I. G. Outstanding Questions in Mitophagy: What We  
439 Do and Do Not Know. *J. Mol. Biol.* (2019) doi:10.1016/j.jmb.2019.06.032.
- 440 9. Georgakopoulos, N. D., Wells, G. & Campanella, M. The pharmacological regulation  
441 of cellular mitophagy. *Nat. Chem. Biol.* **13**, 136–146 (2017).
- 442 10. Wauer, T., Simicek, M., Schubert, A. & Komander, D. Mechanism of phospho-  
443 ubiquitin-induced PARKIN activation. *Nature* **524**, 370–4 (2015).
- 444 11. Lazarou, M. *et al.* The ubiquitin kinase PINK1 recruits autophagy receptors to induce  
445 mitophagy. (2015) doi:10.1038/nature14893.
- 446 12. Stephani, M. & Dagdas, Y. Plant Selective Autophagy - Still an uncharted territory with  
447 a lot of hidden gems. *J. Mol. Biol.* (2019) doi:10.1016/j.jmb.2019.06.028.
- 448 13. Li, F., Chung, T. & Vierstra, R. D. AUTOPHAGY-RELATED11 plays a critical role in  
449 general autophagy- and senescence-induced mitophagy in Arabidopsis. *Plant Cell* **26**,  
450 788–807 (2014).
- 451 14. Ashrafi, G. & Schwarz, T. L. The pathways of mitophagy for quality control and  
452 clearance of mitochondria. *Cell Death Differ.* **20**, 31–42 (2013).
- 453 15. Zhou, Q. *et al.* Mitochondrial endonuclease G mediates breakdown of paternal  
454 mitochondria upon fertilization. *Science* (80- ). **353**, 394–399 (2016).
- 455 16. Klionsky, D. J. *et al.* Guidelines for the use and interpretation of assays for monitoring  
456 autophagy (3rd edition). *Autophagy* **12**, 1–222 (2016).
- 457 17. Marshall, R. S. & Vierstra, R. D. Autophagy: The Master of Bulk and Selective  
458 Recycling. *Annu. Rev. Plant Biol.* **69**, 173–208 (2018).
- 459 18. Thompson, A. R., Doelling, J. H., Suttangkakul, A. & Vierstra, R. D. Autophagic  
460 Nutrient Recycling in Arabidopsis Directed by the ATG8 and ATG12 Conjugation  
461 Pathways. *Plant Physiol.* **138**, 2097–2110 (2005).
- 462 19. Hanamata, S. *et al.* In vivo imaging and quantitative monitoring of autophagic flux in  
463 tobacco BY-2 cells. 1–11 (2013).
- 464 20. Kellner, R., De la Concepcion, J. C., Maqbool, A., Kamoun, S. & Dagdas, Y. F. ATG8  
465 Expansion: A Driver of Selective Autophagy Diversification? *Trends Plant Sci.* (2016)  
466 doi:10.1016/j.tplants.2016.11.015.
- 467 21. Svenning, S., Lamark, T., Krause, K. & Johansen, T. Plant NBR1 is a selective  
468 autophagy substrate and a functional hybrid of the mammalian autophagic adapters  
469 NBR1 and p62 / SQSTM1. **3**, 993–1010 (2011).
- 470 22. Kholmukhamedov, A., Schwartz, J. M. & Lemasters, J. J. Isolated mitochondria infusion  
471 mitigates ischemia-reperfusion injury of the liver in rats: mitotracker probes and



- 472 mitochondrial membrane potential. *Shock* **39**, 543 (2013).
- 473 23. Yoshii, S. R., Kishi, C., Ishihara, N. & Mizushima, N. Parkin mediates proteasome-  
474 dependent protein degradation and rupture of the outer mitochondrial membrane. *J.*  
475 *Biol. Chem.* **286**, 19630–19640 (2011).
- 476 24. Lieber, T., Jeedigunta, S. P., Palozzi, J. M., Lehmann, R. & Hurd, T. R. Mitochondrial  
477 fragmentation drives selective removal of deleterious mtDNA in the germline. *Nature*  
478 **570**, 380–384 (2019).
- 479 25. Twig, G. & Shirihai, O. S. The interplay between mitochondrial dynamics and  
480 mitophagy. *Antioxidants Redox Signal.* **14**, 1939–1951 (2011).
- 481 26. El Zawily, A. M. et al. FRIENDLY Regulates Mitochondrial Distribution, Fusion, and  
482 Quality Control in Arabidopsis. *Plant Physiol.* **166**, 808–828 (2014).
- 483 27. Ka, K., Mai, K., Gao, P. & Kang, B. Electron Microscopy Views of Dimorphic  
484 Chloroplasts in C4 Plants. **11**, 1–7 (2020).
- 485 28. Mizushima, N. A brief history of autophagy from cell biology to physiology and  
486 disease. *Nat. Cell Biol.* **20**, 521–527 (2018).
- 487 29. Pohl, C. & Dikic, I. Cellular quality control by the ubiquitin-proteasome system and  
488 autophagy. *Science (80-. )*. **366**, 818–822 (2019).
- 489 30. Levine, B. & Kroemer, G. Biological Functions of Autophagy Genes: A Disease  
490 Perspective. *Cell* **176**, 11–42 (2019).
- 491 31. Wade Harper, J., Ordureau, A. & Heo, J. M. Building and decoding ubiquitin hains for  
492 mitophagy. *Nat. Rev. Mol. Cell Biol.* **19**, 93–108 (2018).
- 493 32. Sato, M. & Sato, K. Degradation of Paternal Mitochondria. *Science (80-. )*. **37**, 1141–  
494 1144 (2011).
- 495 33. Cummins, J. M. et al. Postfertilization Autophagy of Sperm. **1**, 1144–1148 (2011).
- 496 34. Malka, F. et al. Separate fusion of outer and inner mitochondrial membranes. *EMBO*  
497 *Rep.* **6**, 853–859 (2005).
- 498 35. Arimura, S. Fission and fusion of plant mitochondria, and genome maintenance. *Plant*  
499 *Physiol.* pp.01025.2017 (2017) doi:10.1104/pp.17.01025.
- 500 36. Sheahan, M. B., McCurdy, D. W. & Rose, R. J. Mitochondria as a connected  
501 population: Ensuring continuity of the mitochondrial genome during plant cell  
502 dedifferentiation through massive mitochondrial fusion. *Plant J.* **44**, 744–755 (2005).
- 503 37. Seguí-Simarro, J. M. & Staehelin, L. A. Cell cycle-dependent changes in Golgi stacks,  
504 vacuoles, clathrin-coated vesicles and multivesicular bodies in meristematic cells of  
505 *Arabidopsis thaliana*: A quantitative and spatial analysis. *Planta* **223**, 223–236 (2006).
- 506 38. Wang, Y. et al. Kinetics and specificity of paternal mitochondrial elimination in  
507 *Caenorhabditis elegans*. *Nat. Commun.* **7**, 1–15 (2016).
- 508 39. Wei, Y., Chiang, W. C., Sumpter, R., Mishra, P. & Levine, B. Prohibitin 2 Is an Inner  
509 Mitochondrial Membrane Mitophagy Receptor. *Cell* **168**, 224–238.e10 (2017).
- 510 40. Cox, R. T. & Spradling, A. C. Clueless, a conserved *Drosophila* gene required for  
511 mitochondrial subcellular localization, interacts genetically with parkin. *DMM Dis.*  
512 *Model. Mech.* **2**, 490–499 (2009).
- 513 41. Wang, Z. H., Clark, C. & Geisbrecht, E. R. *Drosophila* clueless is involved in Parkin-  
514 dependent mitophagy by promoting VCP-mediated Marf degradation. *Hum. Mol.*  
515 *Genet.* **25**, 1946–1964 (2016).
- 516 42. Pla-Martín, D. et al. CLUH granules coordinate translation of mitochondrial proteins  
517 with mTORC1 signaling and mitophagy. *EMBO J.* **39**, 1–23 (2020).
- 518 43. Sheard, K. M., Thibault-Sennett, S. A., Sen, A., Shewmaker, F. & Cox, R. T. Clueless  
519 forms dynamic, insulin-responsive bliss particles sensitive to stress. *Dev. Biol.* **459**,  
520 149–160 (2020).
- 521 44. Spinelli, J. B. & Haigis, M. C. The multifaceted contributions of mitochondria to

- 522 cellular metabolism. *Nat. Cell Biol.* **20**, 745–754 (2018).
- 523 45. Raghavendra, A. S., Padmasree, K. & Saradadevi, K. Interdependence of  
524 photosynthesis and respiration in plant cells: interactions between chloroplasts and  
525 mitochondria. *Plant Sci.* **97**, 1–14 (1994).
- 526 46. Van Lis, R. & Atteia, A. Control of mitochondrial function via photosynthetic redox  
527 signals. *Photosynth. Res.* **79**, 133–148 (2004).
- 528 47. Garmash, E. V. et al. Expression profiles of genes for mitochondrial respiratory  
529 energy-dissipating systems and antioxidant enzymes in wheat leaves during de-  
530 etiolation. *J. Plant Physiol.* **215**, 110–121 (2017).
- 531 48. Zhuang, X. et al. A BAR-Domain Protein SH3P2 , Which Binds to Phosphatidylinositol  
532 3-Phosphate and ATG8 , Regulates Autophagosome Formation in Arabidopsis. 1–21  
533 (2013) doi:10.1105/tpc.113.118307.
- 534 49. Paszkiewicz, G., Gualberto, J. M., Benamar, A., Macherel, D. & Logan, D. C.  
535 Arabidopsis seed mitochondria are bioenergetically active immediately upon  
536 imbibition and specialize via biogenesis in preparation for autotrophic growth. *Plant*  
537 *Cell* **29**, 109–128 (2017).
- 538 50. Zhuang, X. et al. ATG9 regulates autophagosome progression from the endoplasmic  
539 reticulum in <em>Arabidopsis</em>. *Proc. Natl. Acad. Sci.* **114**, E426 LP-E435  
540 (2017).
- 541 51. Marshall, R. S., Li, F., Gemperline, D. C., Book, A. J. & Vierstra, R. D. Autophagic  
542 Degradation of the 26S Proteasome Is Mediated by the Dual ATG8/Ubiquitin  
543 Receptor RPN10 in Arabidopsis. *Mol. Cell* **58**, 1053–1066 (2015).
- 544 52. Chung, T., Phillips, A. R. & Vierstra, R. D. ATG8 lipidation and ATG8-mediated  
545 autophagy in Arabidopsis require ATG12 expressed from the differentially controlled  
546 ATG12A and ATG12B loci. *Plant J.* **62**, 483–493 (2010).
- 547 53. Kang, B. H. *Electron microscopy and high-pressure freezing of arabidopsis. Methods in Cell*  
548 *Biology* vol. 96 (Elsevier Inc., 2010).
- 549 54. Wang, P., Chen, X., Goldbeck, C., Chung, E. & Kang, B. H. A distinct class of vesicles  
550 derived from the trans-Golgi mediates secretion of xylogalacturonan in the root  
551 border cell. *Plant J.* **92**, 596–610 (2017).
- 552 55. Liang, Z. et al. Thylakoid-bound polysomes and a dynamin-related protein, FZL,  
553 mediate critical stages of the linear chloroplast biogenesis program in greening  
554 arabidopsis cotyledons. *Plant Cell* **30**, 1476–1495 (2018).
- 555 56. Toyooka, K. & Kang, B.-H. Reconstructing Plant Cells in 3D by Serial Section Electron  
556 Tomography BT - Plant Cell Morphogenesis: Methods and Protocols. in (eds. Žárský,  
557 V. & Cvrčková, F.) 159–170 (Humana Press, 2014). doi:10.1007/978-1-62703-643-  
558 6\_13.
- 559 57. Mai, K.K.K. & Kang, B.-H. Semiautomatic Segmentation of Plant Golgi Stacks in  
560 Electron Tomograms Using 3dmod. - Plant Protein Secretion: Methods and Protocols.  
561 in (eds. Liwen Jiang) 97–104 (Springer Science+Business Media, 2017). doi:  
562 10.1007/978-1-4939-7262-3\_8
- 563  
564  
565  
566  
567  
568

# Main Figures

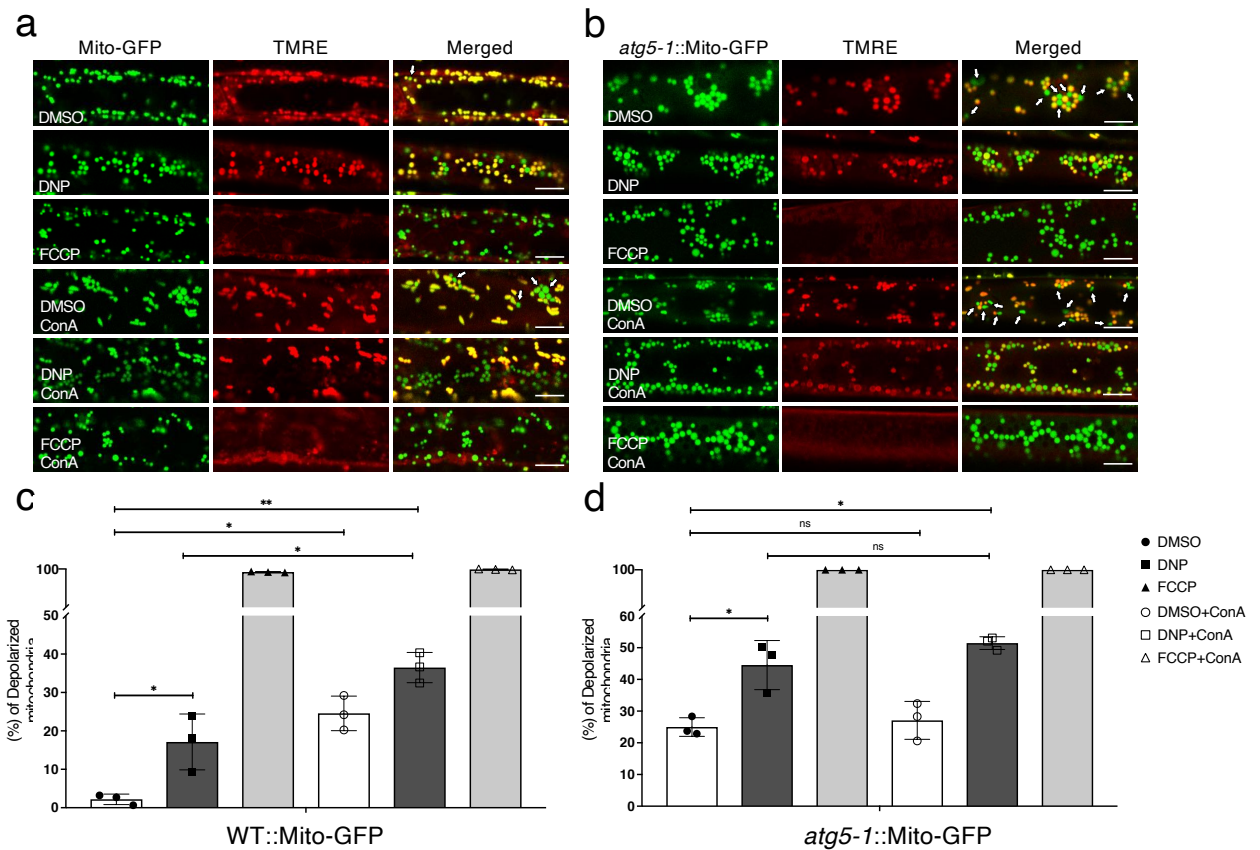

**Figure 1. Arabidopsis root cells accumulate depolarized mitochondria upon uncoupler treatments.**

**a,b**, Uncoupler treatment induced mitochondria depolarization. Confocal micrographs of wild-type (**a**) and *atg5-1* (**b**) root cells expressing a mitochondrion-targeted GFP (Mito-GFP) after uncoupler treatment. Mitochondria were prestained with TMRE. Normal mitochondria exhibit yellow fluorescence while depolarized mitochondria exhibit green fluorescence (arrows) in DMSO or DMSO + ConA panels in the merged image columns. Note that most mitochondria are round. Scale bars, 8  $\mu$ m. **c,d**, Histograms illustrating the percentage of depolarized mitochondria in wild type (WT) and *atg5-1* root cells expressing Mito-GFP at each treatment conditions. Bars represent the mean ( $\pm$  SD) of three biological replicates, each generated with three technical replicates. About 500 mitochondria from 10 cells (five root samples) were counted per condition. Asterisks (\*) denote significant differences in depolarized mitochondria percentages relative to DMSO control group under each condition (unpaired t-test, \* $p < 0.05$ , \*\* $p < 0.01$ , ns, no significant difference).

**a**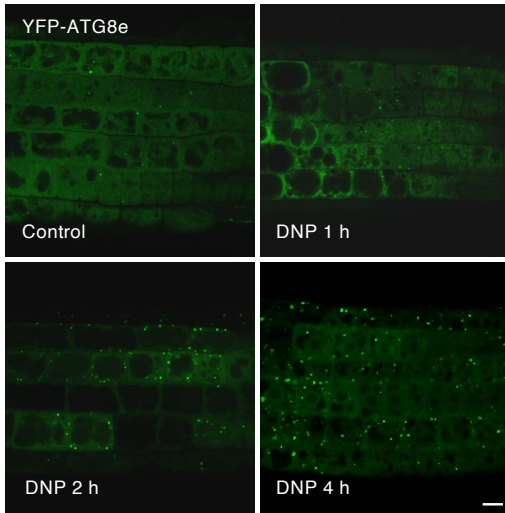**b**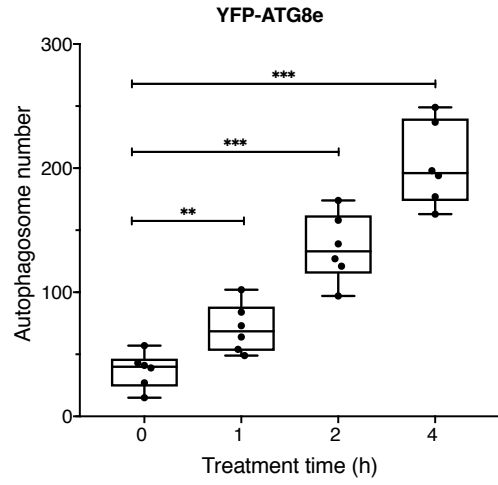**c**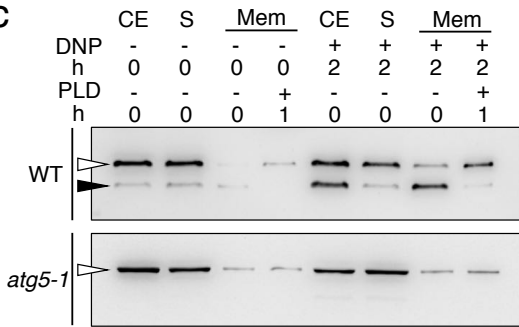**d**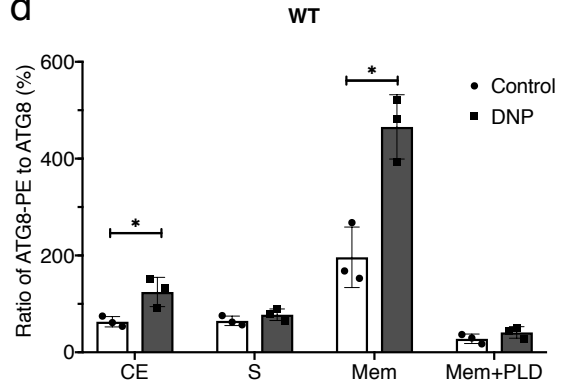**e**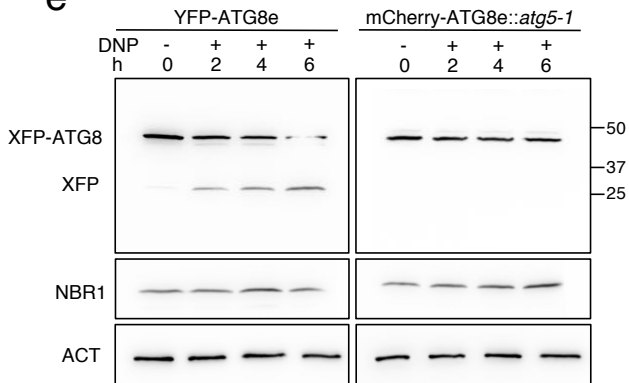**f**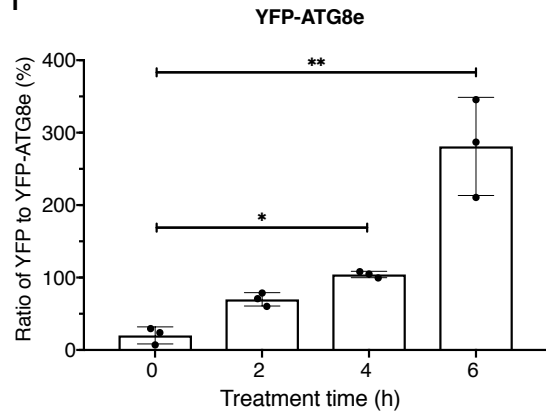

**Figure 2. Uncoupler treatments induce autophagy.**

**a**, DNP treatment induces autophagosome formation. *Arabidopsis* YFP-ATG8e seedlings were incubated in DNP solution for varying periods (0-4 h) before imaging. **b**, Quantification of the number of autophagosomes from more than five independent root samples (unpaired t-test, \*\* $p < 0.01$ , \*\*\* $p < 0.001$ ). Scale bars, 8  $\mu\text{m}$ . **c**, Uncoupler treatment activates ATG8 lipidation. Protein crude extracts (CE) were prepared from *Arabidopsis* root cells following incubation in DNP for 2 hours. Soluble (S) and membrane (Mem) fractions were separated and examined by immunoblot analysis with an anti-ATG8 antibody. White arrowheads mark ATG8. An additional polypeptide recognized by the antibody is enriched in the membrane fraction when cells are incubated with DNP (black arrowhead). **d**, Histograms illustrating polypeptide intensity ratios of lipidated ATG8 to free ATG8 in **(c)**. Bars represent the mean ( $\pm$  SD) of three biological replicates. **e**, ATG8 cleavage assays of DNP treated WT and *atg5-1* seedlings expressing YFP-ATG8e or mCherry-ATG8e, respectively. Protein extracts were prepared from *Arabidopsis* seedlings exposed to DNP (50  $\mu\text{M}$ ) for the indicated time periods and subjected to immunoblot analysis with anti-GFP or anti-mCherry antibodies. NBR1 and Actin were used as control. **f**, Histograms illustrating the polypeptide intensity ratios of free YFP to YFP-ATG8e in **(d)**. Bars represent the mean ( $\pm$  SD) of three biological replicates. (unpaired t-test, \* $p < 0.05$ , \*\* $p < 0.01$ ).

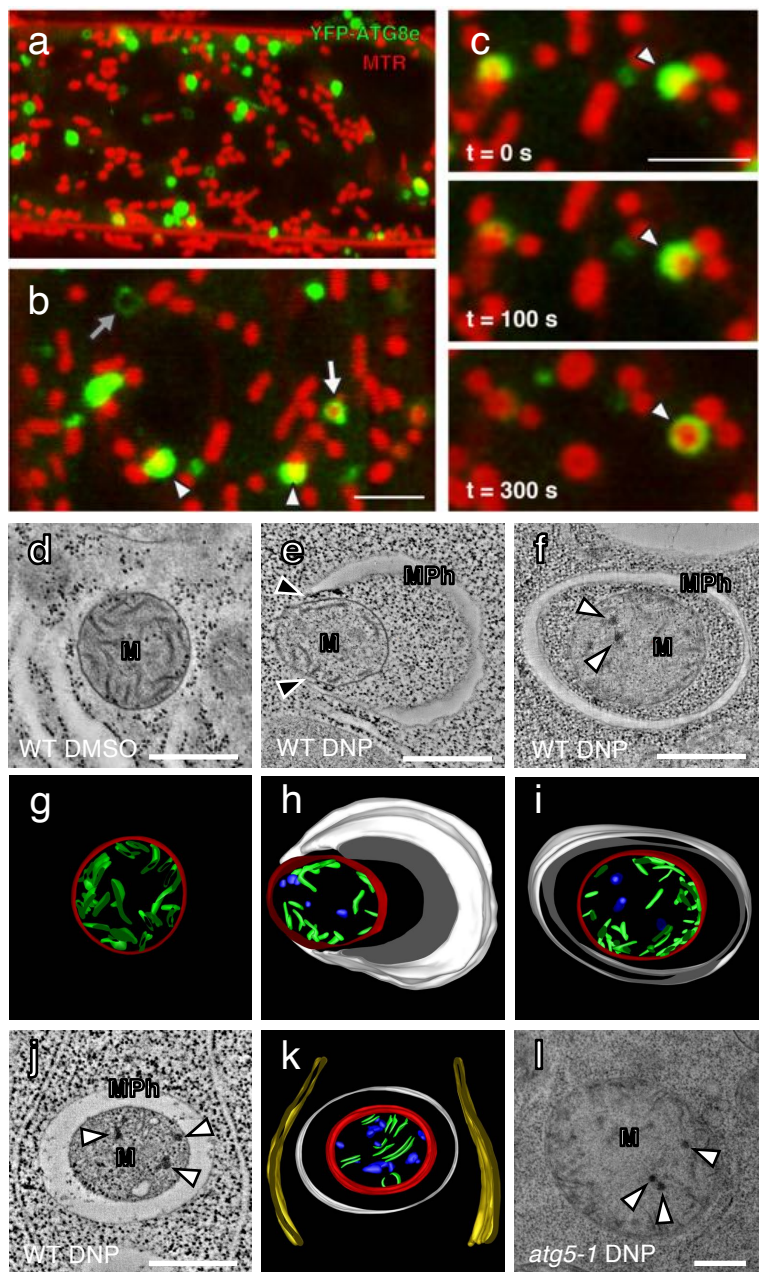



**Figure 3. Depolarized mitochondria are selectively engulfed by autophagosomes in uncoupler-treated *Arabidopsis* root cells.**

**a,b**, DNP treatment induces mitophagy in *Arabidopsis* root cells. Confocal micrographs of *Arabidopsis* root cells expressing YFP-ATG8e stained with MitoTracker Red (MTR) and incubated with DNP for 1 hour. The mitochondria that associate with YFP-ATG8e are indicated with the arrowheads in panel **(b)**. The mitochondria that are completely engulfed by ATG8e fluorescence is marked with a white arrow. Empty YFP fluorescence circles were also observed (grey arrow in panel **(b)**). Scale bars, 5  $\mu\text{m}$ . **c**, Time lapse imaging of a mitophagy event in an *Arabidopsis* root tip cell treated with DNP. The mitochondrion is engulfed by YFP-ATG8e over 5 minutes. Scale bar, 5  $\mu\text{m}$ . **d-f,j,l**, Transmission electron micrographs of mitochondria (M) in *Arabidopsis* WT or *atg5-1* root cells incubated with DMSO or DNP. Mitochondria phagophores (MPh) assemble in the vicinity of the mitochondria. Note that the phagophore tips (black arrow) are in contact with the mitochondrial surface in **(e)**. **g-i,k**, Three-dimensional models of the mitophagosome (MPh) and its mitochondrial cargo (M) based on the tomogram in **(d-f,j,l)**. Mitophagosome (white), mitochondria outer membrane (red), mitochondria cristae (green), damaged cristae formed aggregates (blue) and ER (yellow) are modeled. White arrows indicate dark aggregates in the matrix of compromised mitochondria. Scale bars, 500 nm.



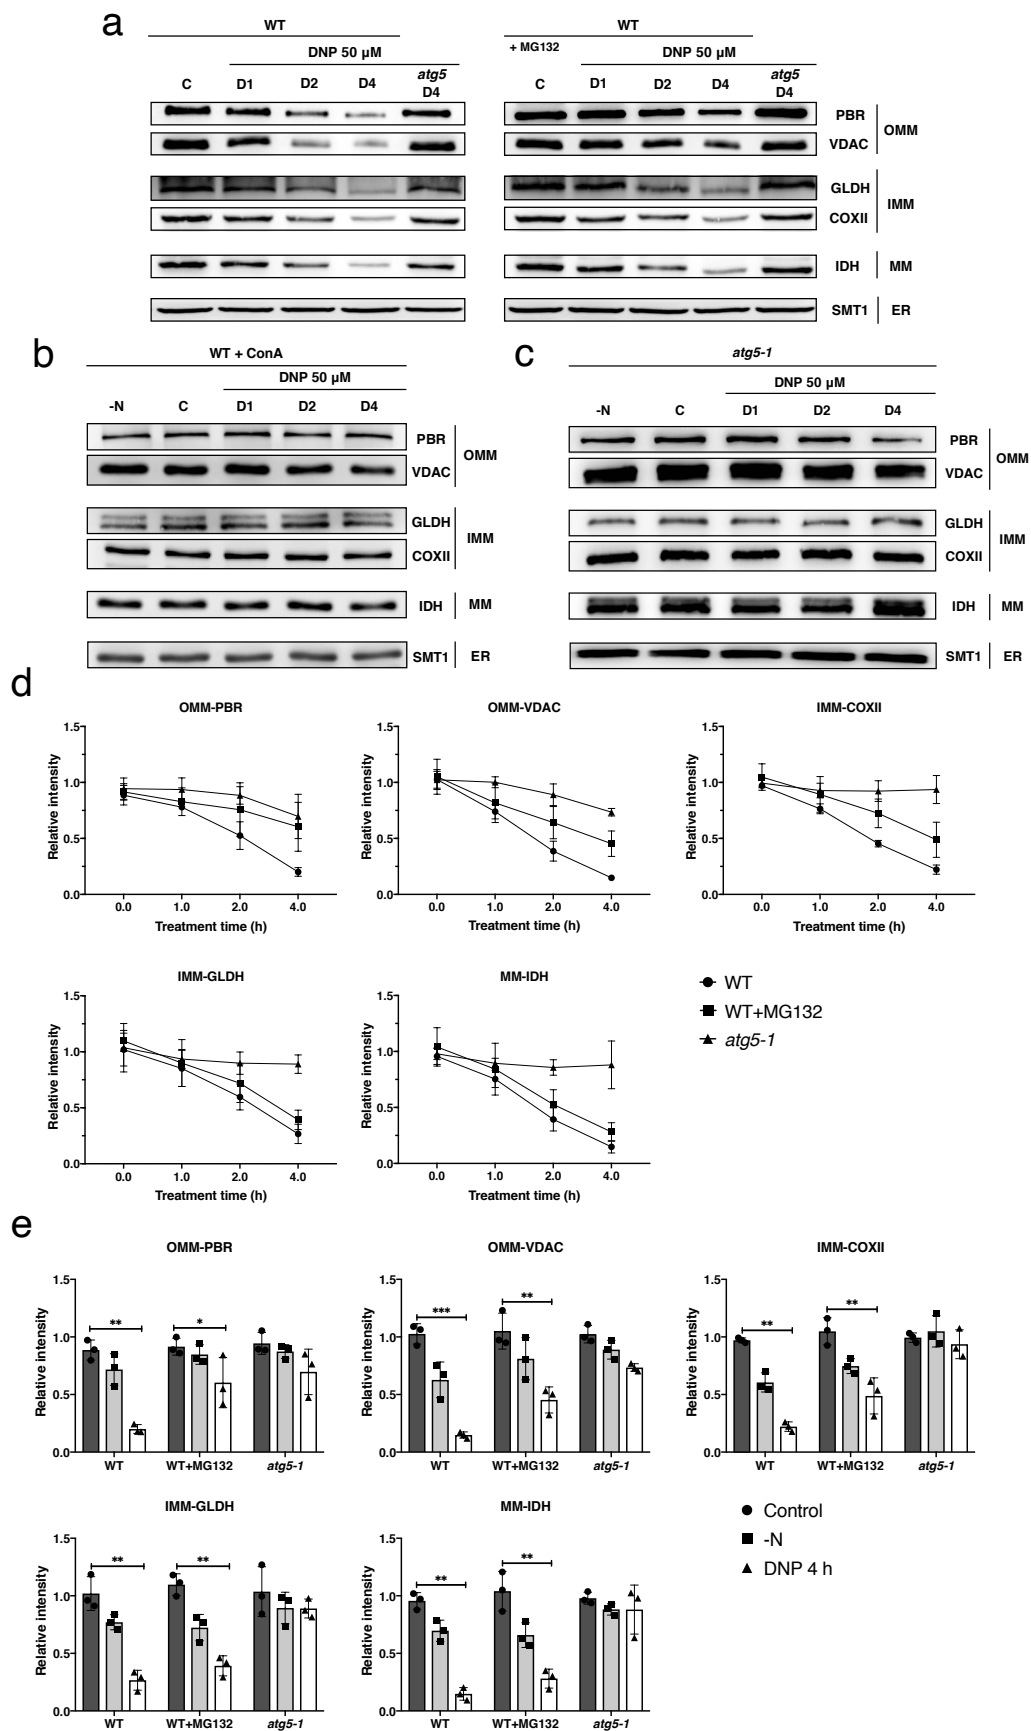

**Figure 4. ATG5-dependent degradation of mitochondrial proteins in uncoupler-treated *Arabidopsis* root cells.**

**a-c**, Immunoblot blot analyses of uncoupler treatment induced mitochondrial protein degradation in *Arabidopsis* WT and *atg5-1* seedlings. WT and *atg5-1* mutant *Arabidopsis* roots were incubated in DNP solution for 1 to 4 hours (D1-D4) or nitrogen starvation (-N) solutions for 1 day. Mitochondrial outer membrane, mitochondrial matrix, and endomembrane fractions were isolated and subjected to immunoblot analyses. For outer mitochondrial membrane (OMM) proteins, PBR and VDAC1, for inner mitochondrial membrane (IMM) COXII and GLDH, and for mitochondrial matrix IDH were analysed. Concanamycin A (ConA) was added to the treatment solution to test for vacuolar function in mitochondrial protein degradation. Proteasome inhibitor MG132 was added to test the involvement of proteasomes in the recycling of mitochondrial membrane proteins (**c**). Note that an ER protein, SMT1 was not affected by DNP treatment. Equal amounts of protein extracts were analysed in the immunoblots shown. **d**, Line charts illustrating degradation rates of OMM proteins (PBR and VDAC1), IMM proteins (COXII and GLDH), and MM protein (IDH) in WT treated with DNP (WT), *atg5-1* treated with DNP (*atg5-1*), and WT treated with DNP and MG132 (WT+MG132). **e**, Histograms illustrating the levels of mitochondria membrane proteins under the three treatment conditions, DMSO 4h (Control), DNP 4 h, and nitrogen starvation (-N) in WT and *atg5-1* root cells. The polypeptide intensity values were normalized to that of the loading control (SMT1). Bars represent the mean ( $\pm$  SD) and the asterisks (\*) indicate decreases in polypeptide readouts significantly from that of the control (C) point (unpaired t-test, \*P < 0.05, \*\*P < 0.01, \*\*\*P < 0.01).

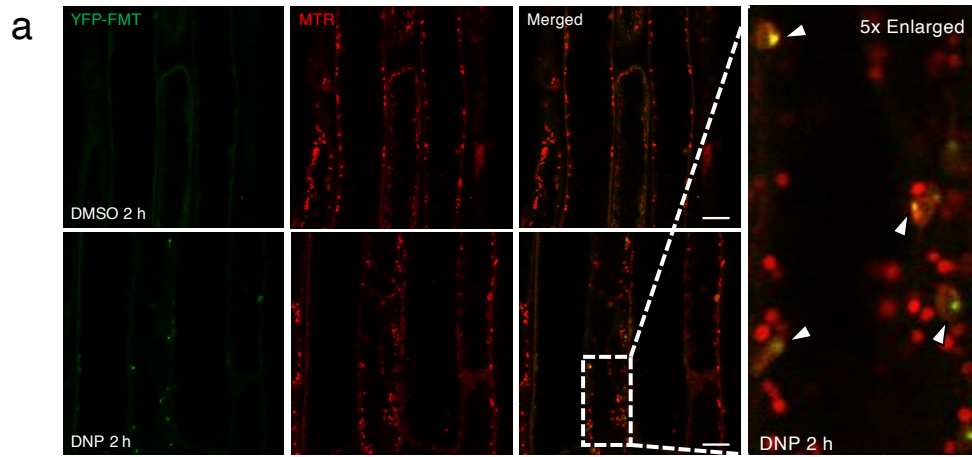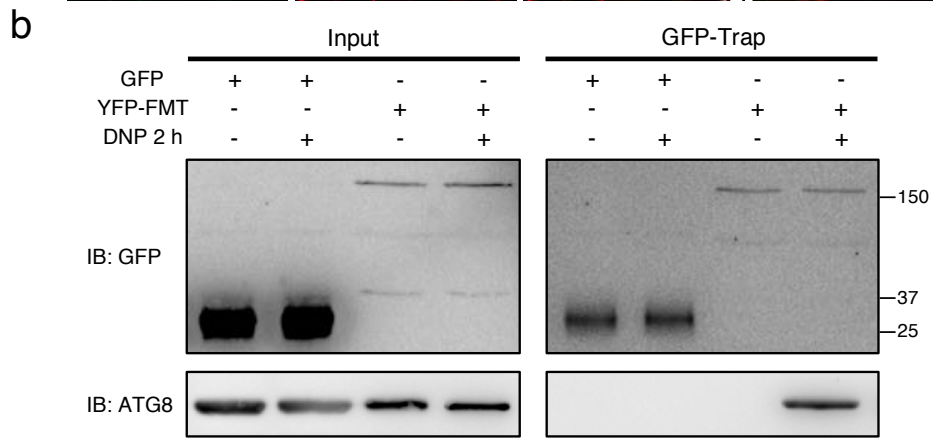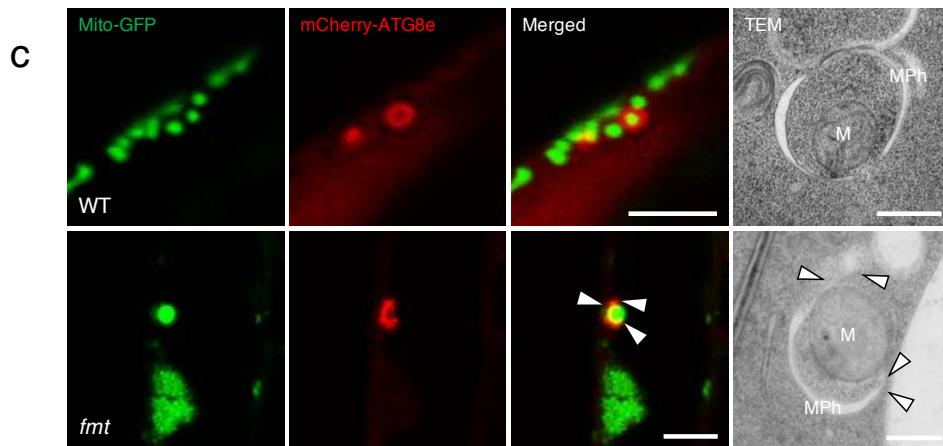

**Figure 5. Friendly associates with damaged mitochondria and ATG8 upon uncoupler treatment.**

**a**, DNP treatment induces recruitment of Friendly (FMT) to damaged mitochondria. Confocal micrographs of *Arabidopsis* root cells expressing a YFP-tagged FMT (YFP-FMT) prestained with MTR. FMT-YFP seedlings were incubated with DMSO or DNP for 1 hour prior to imaging. Scale bars, 8  $\mu$ m. **b**, FMT associates with ATG8 upon DNP treatment. *Arabidopsis* root cells expressing YFP-FMT were incubated with DMSO or DNP for 2 hours and then subjected to immunoprecipitation with GFP-trap followed by immunoblotting with indicated antibodies. **c**, Confocal micrographs of *Arabidopsis* WT and *fnt* root cells expressing mitochondria-targeted GFP (Mito-GFP) and mCherry-targeted ATG8e (mCherry-ATG8e). WT or *fnt* plants seedlings were incubated with DNP for 1 hour prior to imaging. Scale bars, 8  $\mu$ m. Transmission electron microscopy (TEM) photos show mitochondrial phagophores (MPh) assemble in the vicinity of the mitochondria (M) under the condition for the experiment in **(a)**. Arrowhead point to defective phagophores in confocal and TEM micrographs. Scale bars, 500 nm.

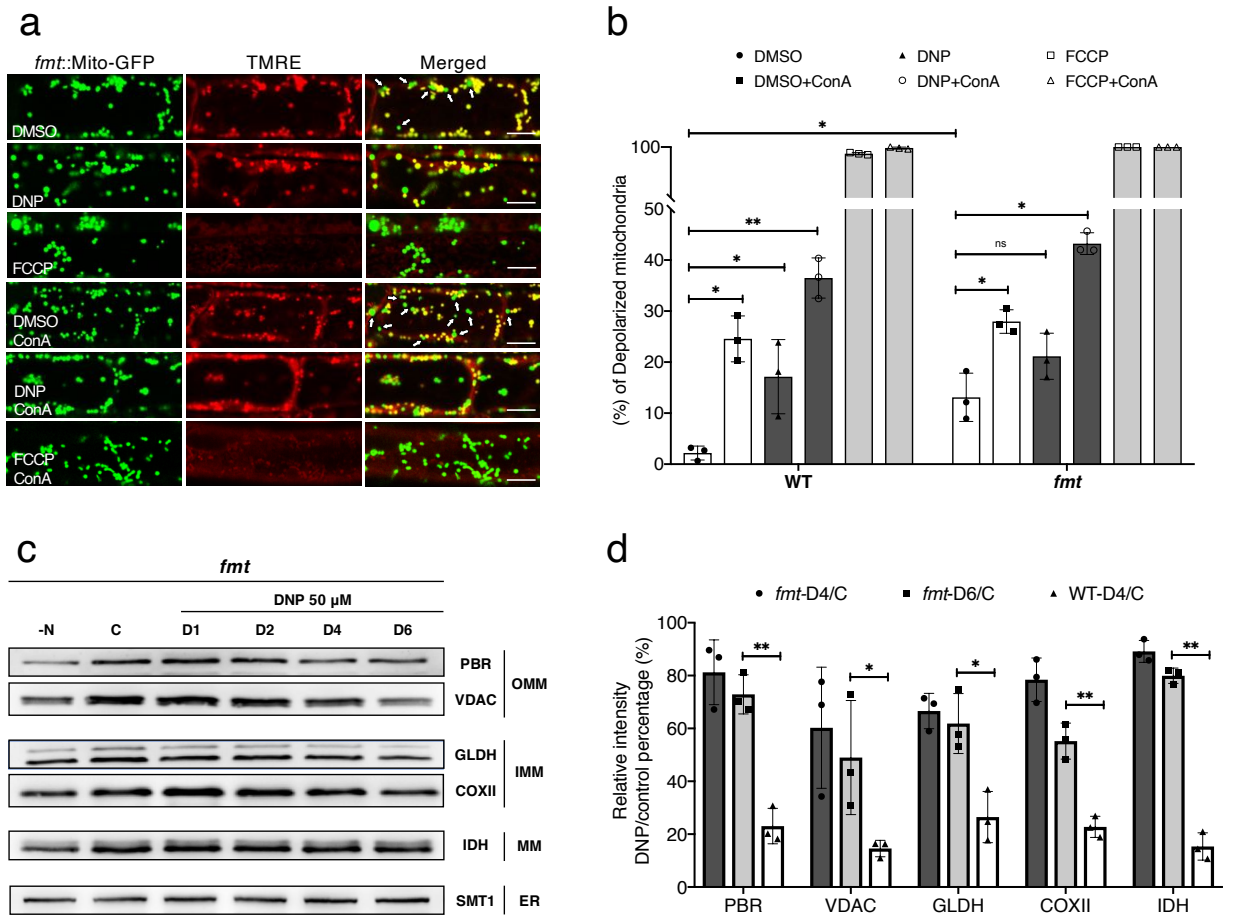

**Figure 6. *Arabidopsis* friendly mutant have defects in clearance of depolarized mitochondria.**

**a**, Uncoupler treatment induced mitochondria depolarization in *Arabidopsis* friendly mutant (*fmt*). Confocal micrographs of *fmt* root cells expressing a mitochondrion-targeted GFP (Mito-GFP), stained with TMRE. Normal mitochondria exhibit yellow fluorescence and depolarized mitochondria exhibit green fluorescence, denoted with arrows in DMSO or DMSO +ConA panels in the merged image column. *Arabidopsis* seedlings were incubated with DMSO, DNP or FCCP with or without ConA for 1 hour prior to imaging. Scale bars, 8  $\mu$ m. **b**, Histograms illustrating the percentage of depolarized mitochondria for each treatment conditions. Bars represent the mean ( $\pm$  SD) of three biological replicates. About 500 mitochondria from 10 cells (five root samples) were counted per condition. An asterisk (\*) represents a significant difference of depolarized mitochondria percentage in each treatment relative to DMSO control group (unpaired t-test, \* $p$ <0.05, \*\* $p$ <0.01). **c**, Uncoupler treatment induced mitochondrial protein degradation in *fmt* mutant. *Arabidopsis* *fmt* mutant roots were incubated in DNP solutions for 1 hour to 6 hours (D1-D6) or nitrogen starvation (N-) solutions for 1 day. For outer mitochondrial membrane (OMM) proteins, PBR and VDAC1, for inner mitochondrial membrane (IMM) COXII and GLDH, and for mitochondrial matrix IDH were examined with immunoblot analysis. Note that an ER protein, SMT1, was not affected by DNP treatment. **d**, Histograms illustrating the levels of mitochondrial membrane protein degradation for the DNP treatment (DNP 4 h, DNP 6 h) in WT and *fmt* root cells. The polypeptide intensity values were normalized with that of the loading control (SMT1) and the percentage of DNP treatment group to control group are quantitated. Bars represent the mean ( $\pm$  SD) and the asterisks (\*) indicate the significantly difference in polypeptide readouts between *fmt* and WT groups (unpaired t-test, \* $P$  < 0.05, \*\* $P$  < 0.01).

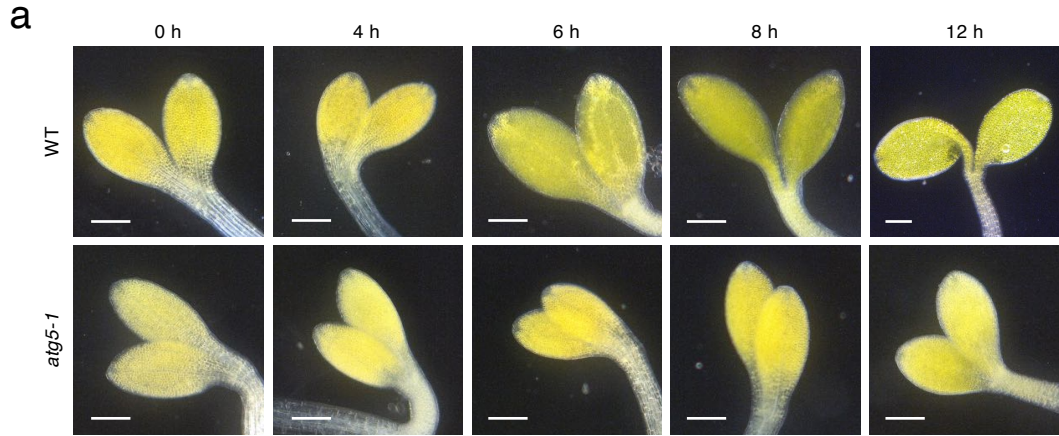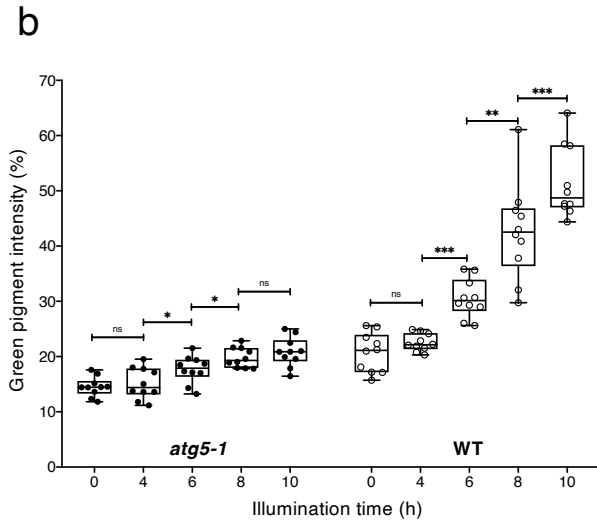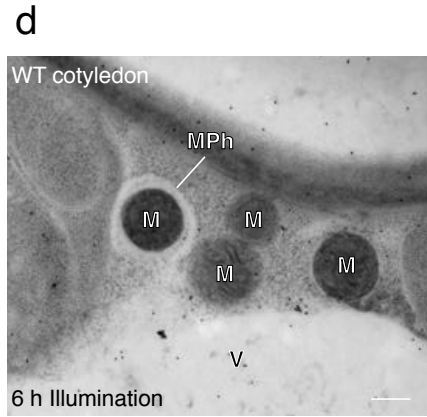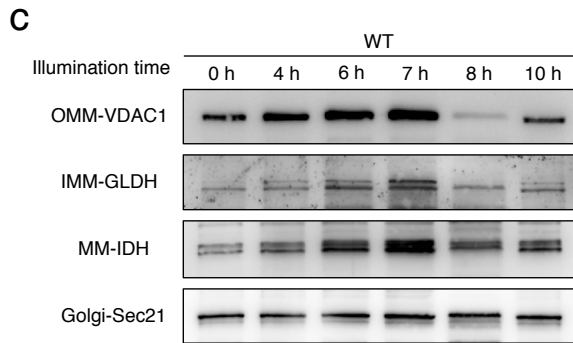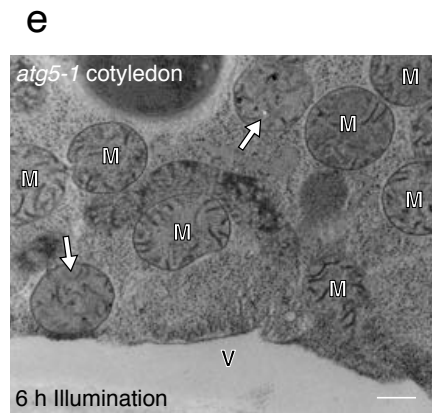

**Figure 7. Mitophagy is triggered during de-etiolation of *Arabidopsis* seedlings.**

a, Cotyledon greening after light exposure in WT and *atg5-1* *Arabidopsis*. Darkfield stereo microscopy photos showing *Arabidopsis* WT and *atg5-1* mutant cotyledon at multiple time points (0-12 h) after illumination. *Arabidopsis* seedlings were grown darkness before the experiment. Scale bars, 1 mm. b, Quantification of the green pigments in cotyledons after light exposure. The green colour of ten *Arabidopsis* cotyledons for each time points were calculated from their photos and normalized against the dark background. (unpaired t-test, \* $p < 0.05$ , \*\* $p < 0.01$ , \*\*\* $p < 0.001$ , ns, no significant difference). c, Immunoblot analyses of mitochondrial proteins in *Arabidopsis* seedlings during de-etiolation. For outer mitochondrial membrane (OMM) proteins, PBR and VDAC1, for inner mitochondrial membrane (IMM) COXII and GLDH, and for mitochondrial matrix IDH were analysed as representative proteins. An *Arabidopsis* Golgi protein, coatamer subunit gamma (Sec21), was employed as the loading control. d,e, TEM images of a cluster of mitochondria (M) near the vacuole (V) in *Arabidopsis* WT and *atg5-1* cotyledon cell after 6 hours of illumination. Mitochondria were seen to be surrounded by mitophagosome (MPh) in WT. By contrast, compromised mitochondria with dark aggregates were abundant in *atg5-1* (arrows in e) but no mitophagosomes were associated with them. Scale bars, 500 nm.
